# Supplementary material
Source: Royal Society of Chemistry journal article supplement (doi:10.1039/d6ta01646d)
Supplement: d6ta01646d1.pdf [file d6ta01646d1.pdf]

## Supporting Information

### Structurally Engineered Bifunctional Oxygen Electrocatalyst from Cobalt-Based LDH-MOF Architecture

Jianwen Chen,<sup>‡ab</sup> Guangke Huang,<sup>‡b</sup> Fan Yu,<sup>b</sup> Bo Wang,<sup>b</sup> Qing Shi,<sup>b</sup> Qiliang Wei,<sup>b</sup> Weiyu Yang,<sup>b</sup> Chaoyi Chen<sup>\*a</sup> and Qiao Liu<sup>\*b</sup>

<sup>a</sup> College of materials and metallurgy, Guizhou University, Guiyang 550025, China.

<sup>b</sup> Institute of Micro/Nano Materials and Devices, Ningbo University of Technology, Ningbo 315211, China.

\* Corresponding author at:

College of materials and metallurgy, Guizhou University, Guiyang 550025, China.

Institute of Micro/Nano Materials and Devices, Ningbo University of Technology, Ningbo 315211, China.

E-mail address: ccy197715@126.com (C.Y. Chen); liuqiao@nbut.edu.cn (Q. Liu).

<sup>‡</sup> These authors contributed equally to this work.

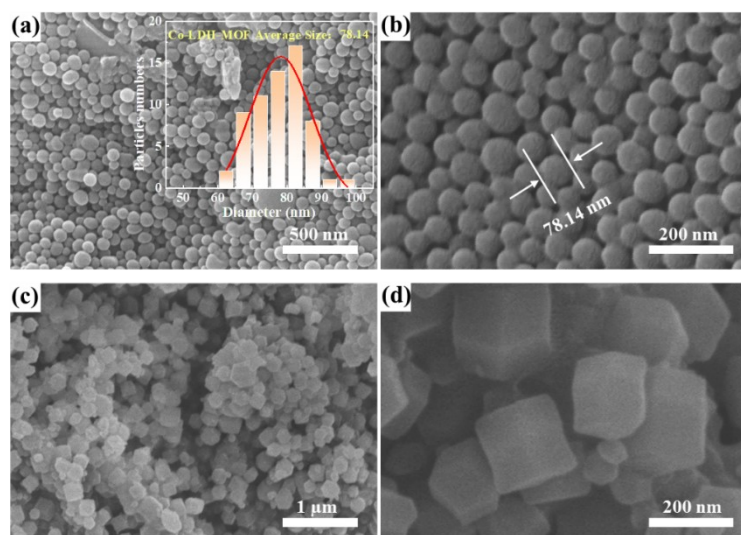

**Fig. S1.** Typical SEM images of Co-LDH-MOF (a, b) and Co-MOF (c, d).

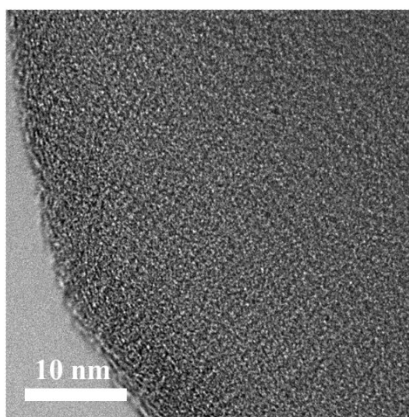

**Fig. S2.** Typical HRTEM image of Co-LDH-MOF.

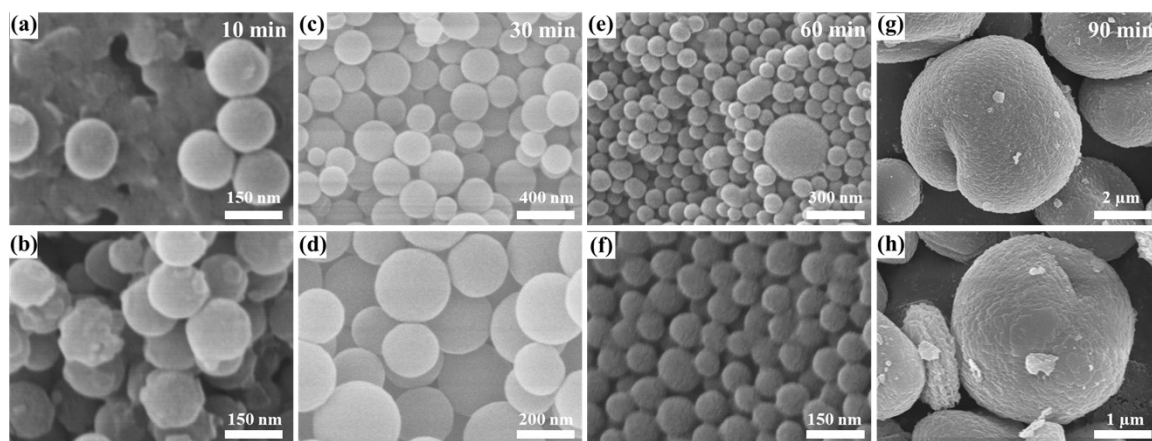

**Fig. S3.** Typical SEM images of Co-LDH-MOF and control samples prepared at different ultrasonication times: (a, b) 10 min, (c, d) 30 min, (e, f) 60 min (Co-LDH-MOF), and (g, h) 90 min.

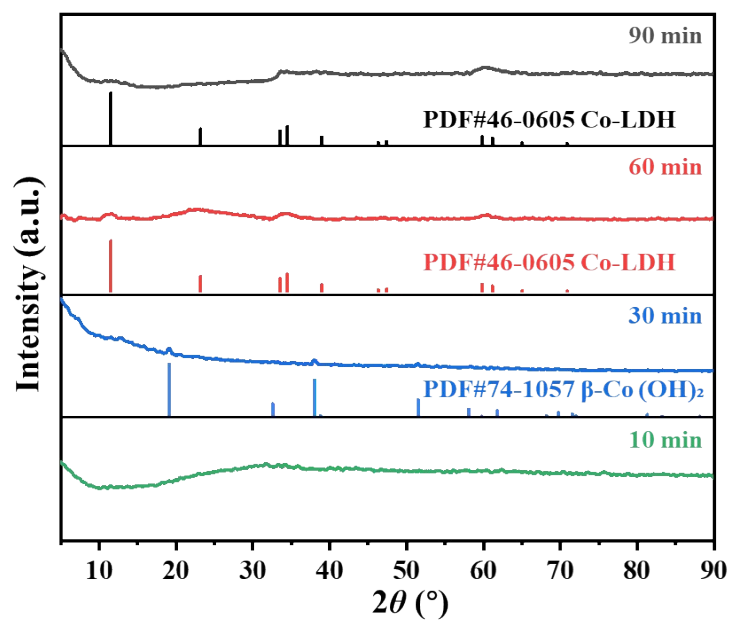

**Fig. S4.** XRD patterns of Co-LDH-MOF and control samples prepared at ultrasonication times of 10, 30, 60 (Co-LDH-MOF), and 90 min.

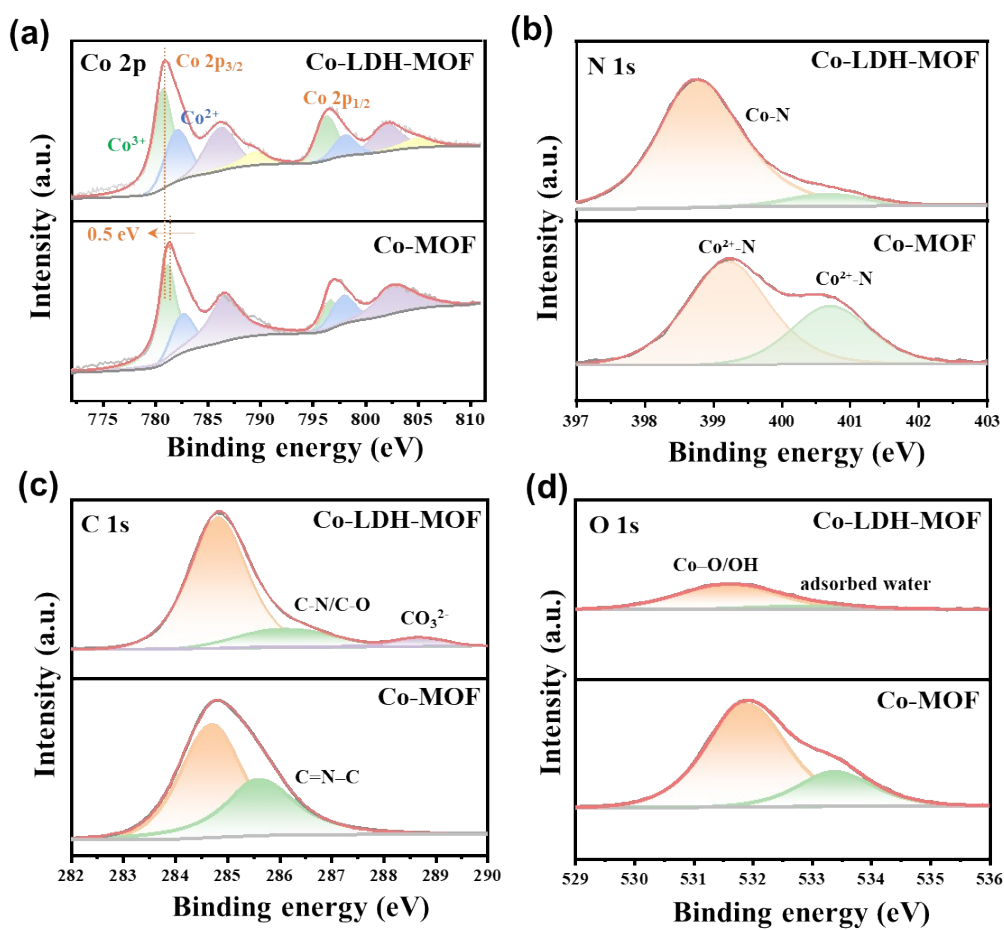

**Fig. S5.** Comparative high-resolution XPS spectra of Co 2p (a), N 1s (b), C 1s (c), O 2p (d) for Co-LDH-MOF and Co-MOF.

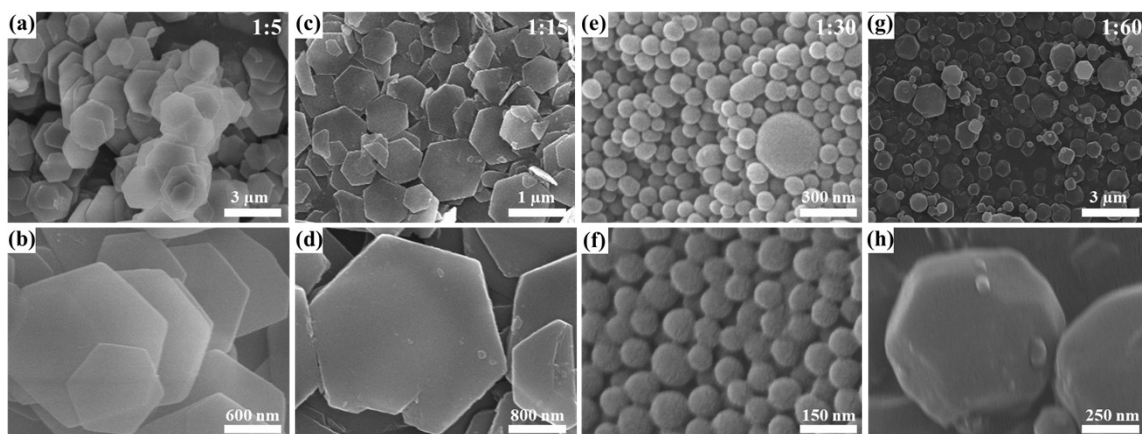

**Fig. S6.** Typical SEM images of Co-LDH-MOF and control samples prepared with different  $\text{Co}(\text{NO}_3)_2$ -to-MeIm molar ratios: (a, b) 1:5, (c, d) 1:15, (e, f) 1:30 (Co-LDH-MOF), and (g, h) 1:60.

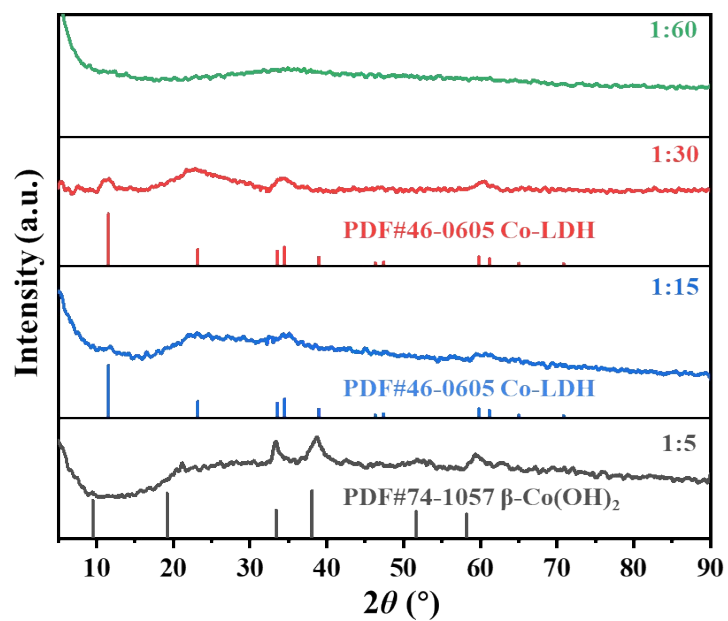

**Fig. S7.** XRD patterns of Co-LDH-MOF and control samples prepared at  $\text{Co}(\text{NO}_3)_2$ -to-MeIm molar ratios of 1:5, 1:15, 1:30 (Co-LDH-MOF), and 1:60.

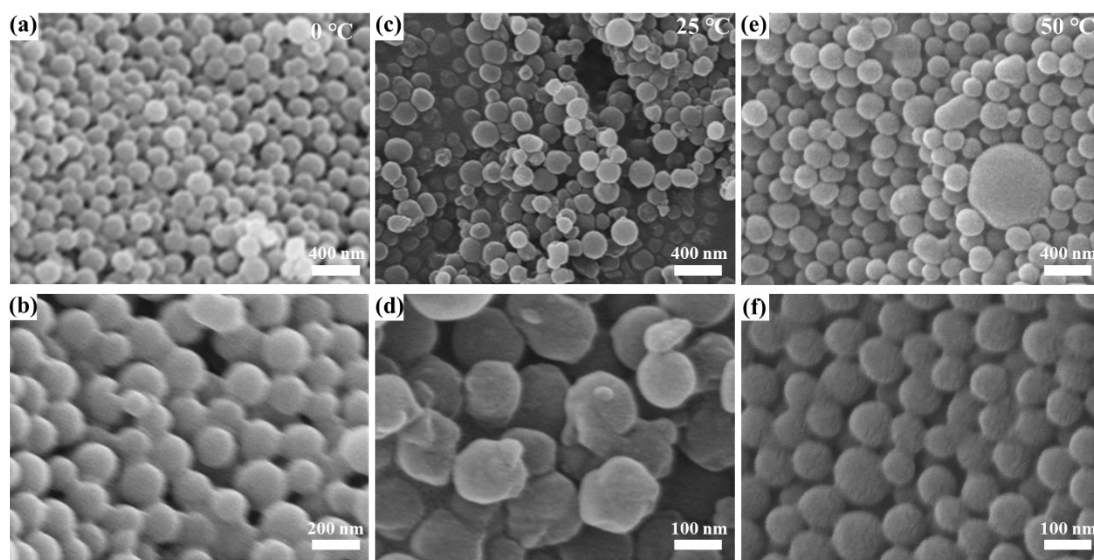

**Fig. S8.** Typical SEM images of Co-LDH-MOF and control samples prepared under similar conditions with different temperatures: (a, b) 0 °C, (c, d) 25 °C, and (e, f) 50 °C (Co-LDH-MOF).

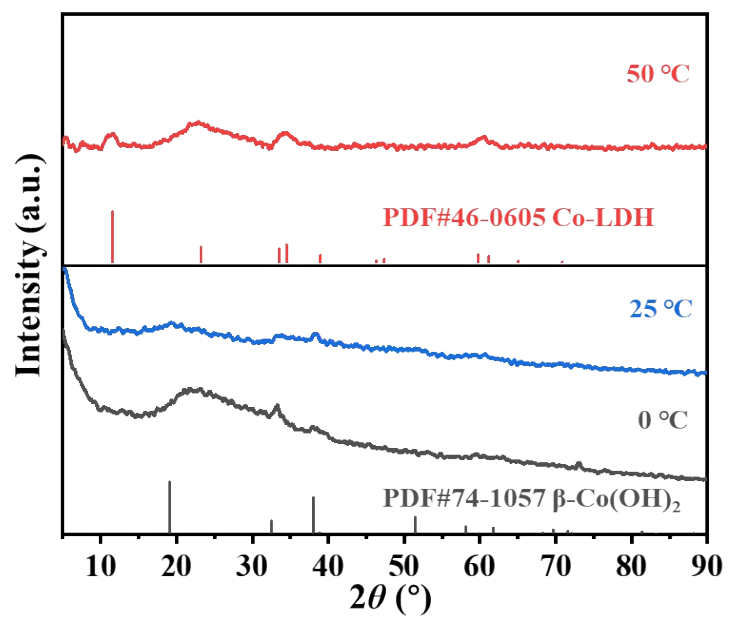

**Fig. S9.** XRD patterns of Co-LDH-MOF and control samples prepared at temperatures of 0, 25, and 50 °C (Co-LDH-MOF).

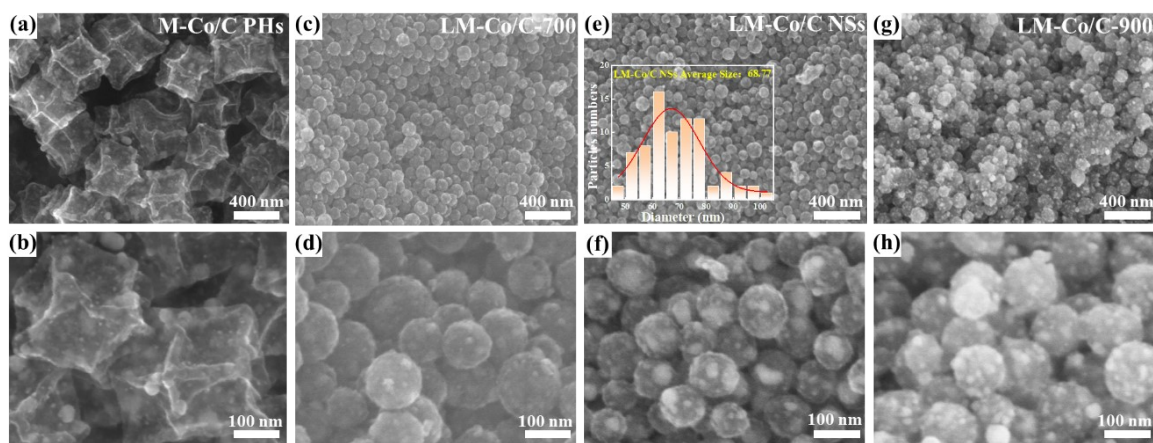

**Fig. S10.** Typical SEM images of M-Co/C PHs (a, b), LM-Co/C-700 (c, d), LM-Co/C-800 (the target sample) (e, f), and LM-Co/C-900 NSs (g, h).

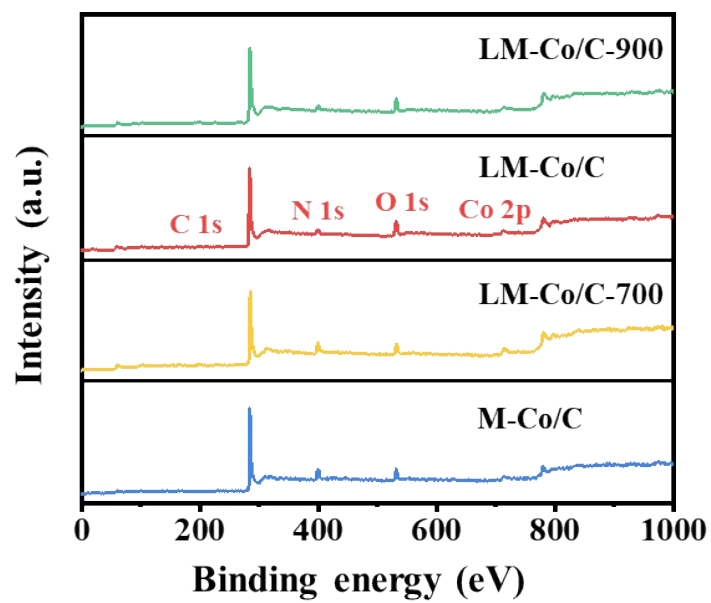

Fig. S11. XPS survey scans of LM-Co/C-T and M-Co/C PHs.

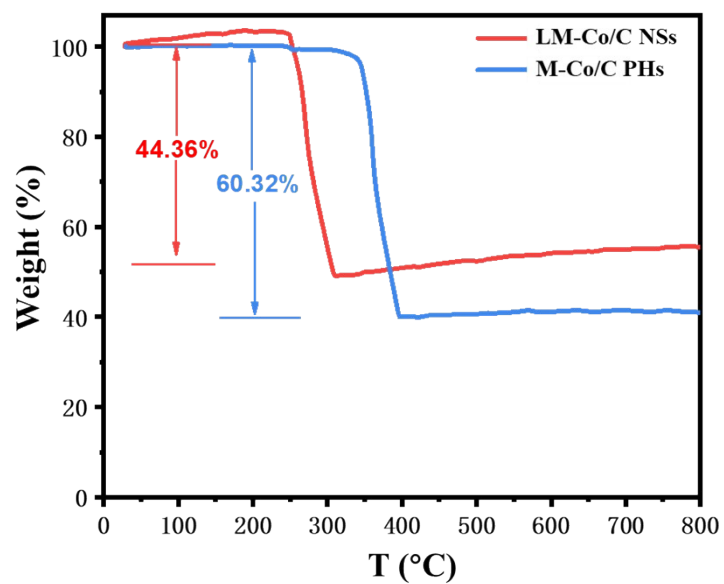

**Fig. S12.** TGA curves of LM-Co/C NSs and M-Co/C PHs conducted in air atmosphere.

**Table S1.** EDX compositional data of LM-Co/C NSs and M-Co/C PHs.

|            | <b>Atomic Fraction (%)</b> | <b>Co</b> | <b>N</b> | <b>C</b> | <b>O</b> |
|------------|----------------------------|-----------|----------|----------|----------|
|            | LM-Co/C NSs                | 38.79     | 2.46     | 44.63    | 14.12    |
| <b>EDX</b> | M-Co/C PHs                 | 16.60     | 23.10    | 54.59    | 5.72     |

**Table S2.** Performance comparison of reported Co-based bifunctional oxygen electrocatalysts.

| Catalysts                                                           | $E_{1/2}$ (V) | $E_{j10}$ (V) | $\Delta E$ (V) | Power density<br>(mW cm <sup>-2</sup> ) | Stability                            | Refs.            |
|---------------------------------------------------------------------|---------------|---------------|----------------|-----------------------------------------|--------------------------------------|------------------|
| <b>LM-Co/C NSs</b>                                                  | <b>0.855</b>  | <b>1.548</b>  | <b>0.693</b>   | <b>167.25</b>                           | <b>1000 h@10 mA cm<sup>-2</sup></b>  | <b>This work</b> |
| (CoO <sub>x</sub> @NC) <sub>2</sub> -NiFe                           | 0.806         | 1.553         | 0.757          | 136.00                                  | 200 h@10 mA cm <sup>-2</sup>         | 1                |
| Co <sub>3</sub> O <sub>4</sub> /CoNGDY                              | 0.854         | 1.540         | 0.689          | 167.60                                  | /                                    | 2                |
| RuO <sub>2</sub> -Co <sub>3</sub> O <sub>4</sub> /NC                | 0.845         | 1.461         | 0.616          | 100.20                                  | 140 h@5 mA cm <sup>-2</sup>          | 3                |
| Co@CoO/BNC                                                          | 0.850         | 1.539         | 0.710          | 115.72                                  | 300 h@2 mA cm <sup>-2</sup>          | 4                |
| CoO@Fe-N-C                                                          | 0.880         | 1.540         | 0.710          | 134.00                                  | 150 cycles@5 mA cm <sup>-2</sup>     | 5                |
| CoO/CoN <sub>x</sub> -C                                             | 0.844         | 1.614         | 0.770          | 161.00                                  | 1000 h@5 mA cm <sup>-2</sup>         | 6                |
| CoO <sub>x</sub> /Co <sub>9</sub> S <sub>8</sub> @NC-2              | 0.830         | 1.460         | 0.630          | 114.50                                  | 427 h@2 mA cm <sup>-2</sup>          | 7                |
| Co/CoO@N-C-40                                                       | 0.854         | 1.579         | 0.725          | 186.00                                  | 750 h@10 mA cm <sup>-2</sup>         | 8                |
| Co-LCFS-800                                                         | 0.834         | 1.584         | 0.750          | /                                       | /                                    | 9                |
| CoFe@CNT                                                            | 0.850         | 1.600         | 0.750          | 115.00                                  | 105 h@20 mA cm <sup>-2</sup>         | 10               |
| ZIF-67-6                                                            | 0.830         | 1.500         | 0.670          | /                                       | /                                    | 11               |
| Co/Co <sub>3</sub> O <sub>4</sub> @NC                               | 0.820         | 1.577         | 0.759          | 156.50                                  | 220 h@10 mA cm <sup>-2</sup>         | 12               |
| 0.1Ni@Co <sub>3</sub> O <sub>4</sub>                                | 0.800         | 1.579         | 0.780          | /                                       | 24 h@5 mA cm <sup>-2</sup>           | 13               |
| N-GNRS/COO                                                          | 0.825         | 1.554         | 0.729          | 138.81                                  | 135 h@10 mA cm <sup>-2</sup>         | 14               |
| CoO <sub>x</sub> /Co@Co-N-C                                         | 0.880         | 1.576         | 0.700          | 168.40                                  | 250 h@5 mA cm <sup>-2</sup>          | 15               |
| CO/CoO-NG                                                           | 0.819         | 1.600         | 0.784          | 244.28                                  | 340 h@5 mA cm <sup>-2</sup>          | 16               |
| CoO@Co-N-C                                                          | 0.790         | 1.630         | 0.840          | 133.50                                  | 210 cycles@50 mA<br>cm <sup>-2</sup> | 17               |
| Co <sub>3</sub> S <sub>4</sub> @Co <sub>3</sub> O <sub>4</sub> /NSC | 0.822         | 1.542         | 0.720          | 122.00                                  | 200 h@10 mA cm <sup>-2</sup>         | 18               |

260-8

|                                                                                |       |       |       |        |                                  |    |
|--------------------------------------------------------------------------------|-------|-------|-------|--------|----------------------------------|----|
| CON/Co <sub>3</sub> O <sub>4</sub> HNP@s@<br>NCNWs                             | 0.835 | 1.560 | 0.725 | 118.30 | 200 cycles@5 mA cm <sup>-2</sup> | 19 |
| Ni <sub>x</sub> Co <sub>1-x</sub> @Ni <sub>x</sub> Co <sub>1-x</sub><br>O/NCNT | 0.790 | 1.610 | 0.820 | 157.00 | 30 h@5 mA cm <sup>-2</sup>       | 20 |

---

## References

- 1 X. Ji, J. Zhang, Y. Wang, H. Cao, J. Yu and D. Chen, *Chem. Eur. J.*, 2025, **31**, e202501103.
- 2 Q. Chang, F. He, Z. Zhang, X. Fu, Y. Wang, C. Huang and Y. Li, *Angew. Chem. Int. Ed.*, 2024, **64**, e202416664.
- 3 M. Hong, L. Zhao, X. Zhang, Y. Yang, C. Du and J. Chen, *Int. J. Hydrogen Energy*, 2025, **106**, 1114-1121.
- 4 J. Zhang, Z. Yang, M. Li, S. Yu, X. Yang, L. Gong and S. Dou, *Resour. Chem. Mater.*, 2025, **25**, 100127.
- 5 X. Liu, T. Yang, H. Song, H. Zhuo, Z. Shi, W. Chen and Y. Chen, *J. Electroanal. Chem.*, 2025, **992**, 119284.
- 6 C. Ma, B. Zhu, Y. Wang, S. Ma, J. Shi, X. Zhang and Y. Song, *J. Colloid Interface Sci.*, 2025, **685**, 793-803.
- 7 Y. Peng, P. Bi, X. Zhu, P. Liu, M. Ren, Y. Zu, X. Li and A. Feng, *Energy Mater. Adv.*, 2025, **6**, 0206.
- 8 T. Li, Y. Ji, Y. Wu, P. Wang, Z. Liu, J. Shu and T. Yi, *Inorg. Chem. Front.*, 2025, **12**, 205-216.
- 9 Y. Wang, R. Gan, X. Shao, B. Dai, L. Ma, J. Yang, J. Shi, X. Zhang, C. Ma and Z. Jin, *J. Colloid Interface Sci.*, 2025, **682**, 934-945.
- 10 Z. Fu, H. Zhuo, X. Liu, W. Li, H. Song, Z. Shi, L. Feng, T. Jin, W. Chen and Y. Chen, *ACS Appl. Energy Mater.*, 2025, **8**, 1051-1059.
- 11 Y. Ju, W. Huang, Z. Gao, M. Liu and N. Huang, *Appl. Mater. Today*, 2025, **42**, 102576.
- 12 H. Xu, H. Zhu, Z. Zhang, C. Huang, T. Shuai, Q. Zhan and G. Li, *Inorg. Chem.*, 2024, **63**, 3702-3711.
- 13 Y. Zhang, C. Huang, J. Lu, H. Cao, C. Zhang and X. Zhao, *Appl. Surf. Sci.*, 2024, **651**, 159241.
- 14 C. Cheng, C. Zhi, Z. Sun, Y. Ming, T. Xiang, Q. Zhu, Z. Wu, B. Li, Y. Li, C. Jin, Y. Cao and J. Yang, *Rare Met.*, 2024, **43**, 1524-1536.
- 15 X. Xie, Z. Zhai, W. Cao, J. Dong, Y. Li, Q. Hou, G. Du, J. Wang, L. Tian, J. Zhang, T. Zhang and L. Shang, *J. Colloid Interface Sci.*, 2024, **664**, 319-328.
- 16 X. Tian, M. Xu, X. Ma, G. Mu, J. Xiao and S. Wang, *ChemSusChem*, 2024, **17**, e202400570.
- 17 L. Gan, L. Han, J. Liu, J. Li, C. Jiang, J. Zhao, K. Chen, D. Jiang and Y. Ren, *J. Electroanal. Chem.*, 2024, **968**, 118503.
- 18 L. Bo, W. Shi, F. Nian, Y. Hu, L. Pu, P. Li, Z. Zhang and J. Tong, *Sep. Purif. Technol.*, 2023, **307**, 122536.
- 19 Q. Zhou, S. Zhang, G. Zhou, H. Pang, M. Zhang, L. Xu, K. Sun, Y. Tang and K. Huang, *Small*, 2023, **19**, 2301324.
- 20 R. Jena, S. Bhattacharyya, N. Bothra, V. Kashyap, S.K. Pati and T.K. Maji, *ACS Appl. Mater. Interfaces*, 2023, **15**, 27893-27904.
